# Supplementary material for: A universal approach to the calculation of the transit light curves
Source: Oxford University Press journal article supplement (doi:10.1093/mnras/stt575), 2013-05-03
Supplement: stt575_Supplementary_Data.zip [file stt575_Supplementary_Data.zip]

Archive with 2 entries (2 files):
- lustre.zip
- description.pdf
