# Supplementary material for: A universal approach to the calculation of the transit light curves
Source: Oxford University Press journal article supplement (doi:10.1093/mnras/stt575), 2013-05-03
Supplement: stt575_Supplementary_Data.zip [file stt575_Supplementary_Data.zip › description.pdf]

This archive contains an ANSI C implementation of the algorithm for calculating of the light curve. Currently, the algorithm is implemented for the linear and quadratic limb-darkening law. The decreasing of the flux of the binary system when radius and brightness at the center of eclipsed star equal unit, radius of the second (eclipsing) component equal  $r$  and the distance between centers of disks equal  $\delta$ :

$$\Delta L(\delta, r) = \Delta L_0(\delta, r) + \Lambda_l[\Delta L_1(\delta, r) - \Delta L_0(\delta, r)] + \Lambda_q[2\Delta L_1(\delta, r) - \Delta L_0(\delta, r) - \Delta L_2(\delta, r)]$$

Here  $\Lambda_l$  is a linear limb-darkening coefficient,  $\Lambda_q$  is a quadratic limb-darkening coefficient. The header file "lustre.h" contain a prototype (headers) of the nine functions with two arguments each: L0, D1L0, D2L0, L1, D1L1, D2L1, L2, D1L2, D2L2. First argument is  $\delta$ , second argument is  $r$ . LX correspond to  $\Delta L_x$ , prefix D1 correspond to derivative with respect to the first argument ( $\delta$ ), prefix D2 correspond to derivative with respect to the second argument ( $r$ ). The module "lustre.c" contains the implementation of these functions.

In addition, the archive contains points and weights used in the application of the Gaussian quadrature formula (in the form of C arrays in the file "gaussp.c"):

$$\int_0^1 h(t)\omega(t)dt \approx \sum_{l=1}^N w_l h(t_l).$$

Here  $N = 14$ .

When  $\omega(t) = 1$ , nodes  $t_l$  correspond to array "nodes\_Legendre", and weights  $w_l$  correspond to array "weights\_Legendre".

When  $\omega(t) = -\sqrt{1-t}\ln(1-t)$ , nodes  $t_l$  correspond to array "nodes\_SqLn", and weights  $w_l$  correspond to array "weights\_SqLn".

When  $\omega(t) = \sqrt{1-t}$ , nodes  $t_l$  correspond to array "nodes\_Jacobi1d2", and weights  $w_l$  correspond to array "weights\_Jacobi1d2".

When  $\omega(t) = (1-t)^{1/4}$ , nodes  $t_l$  correspond to array "nodes\_Jacobi1d4", and weights  $w_l$  correspond to array "weights\_Jacobi1d4".

When  $\omega(t) = (1-t)^{3/4}$ , nodes  $t_l$  correspond to array "nodes\_Jacobi3d4", and weights  $w_l$  correspond to array "weights\_Jacobi3d4".
